# Supplementary material for: Evidence of SARS-CoV-2 convergent evolution in immunosuppressed patients treated with antiviral therapies
Source: PubMed Central journal article supplement (PMC11075269; doi:10.1186/s12985-024-02378-y), 2024-05-07
Supplement: 12985_2024_2378_MOESM2_ESM.pdf [file 12985_2024_2378_MOESM2_ESM.pdf]

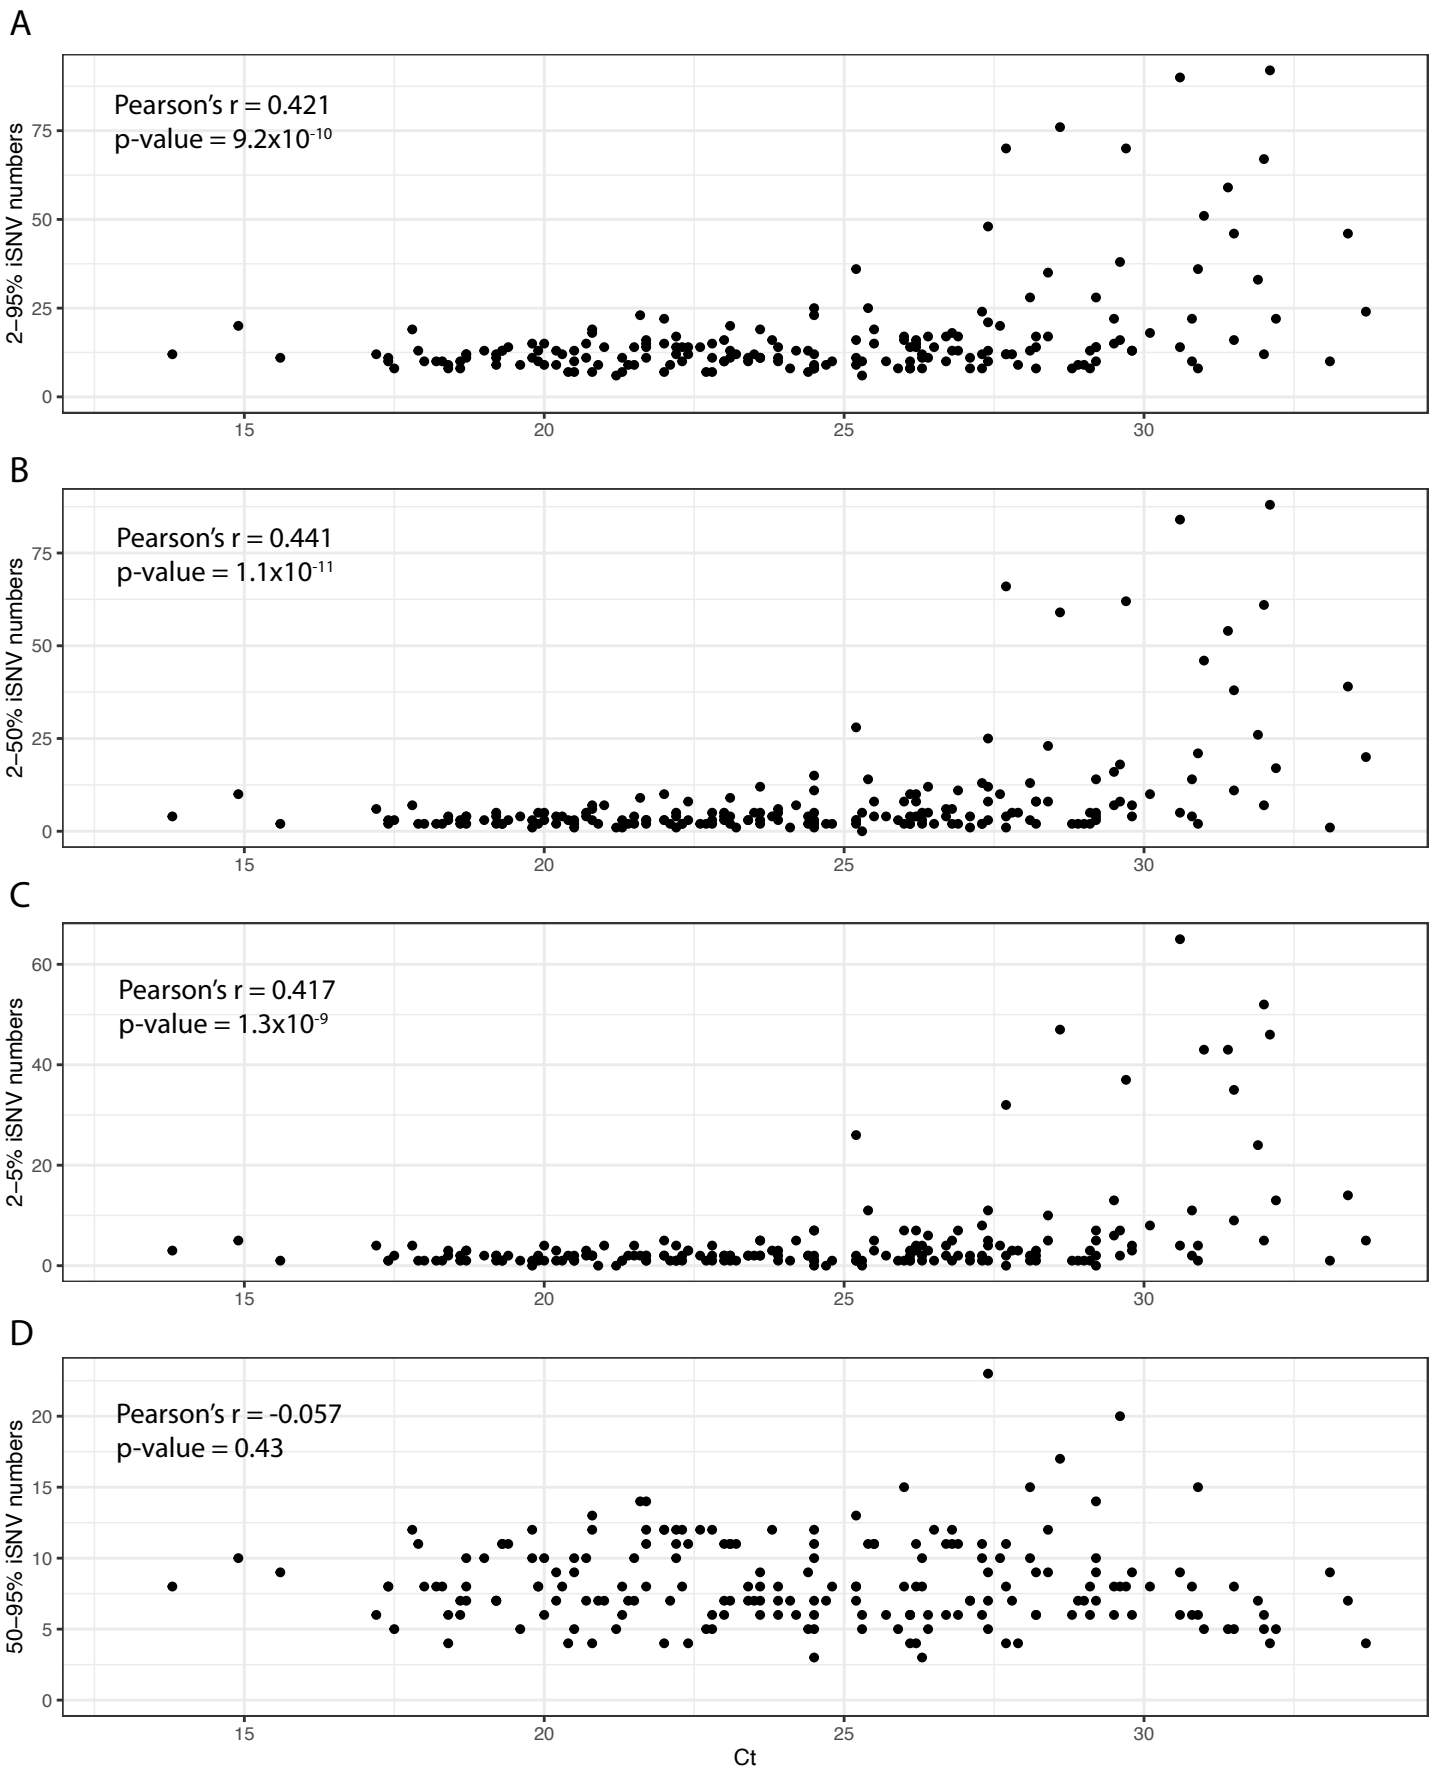

Figure S1. Correlation between iSNV numbers and Ct values of patient samples. The numbers of iSNVs are assessed based on A). 2-95% frequency, B). 2-50% frequency, C). 2-5% frequency, and D). 50-95% frequency. Pearson's coefficient and the corresponding p-values are shown in the upper left corner of each plot.

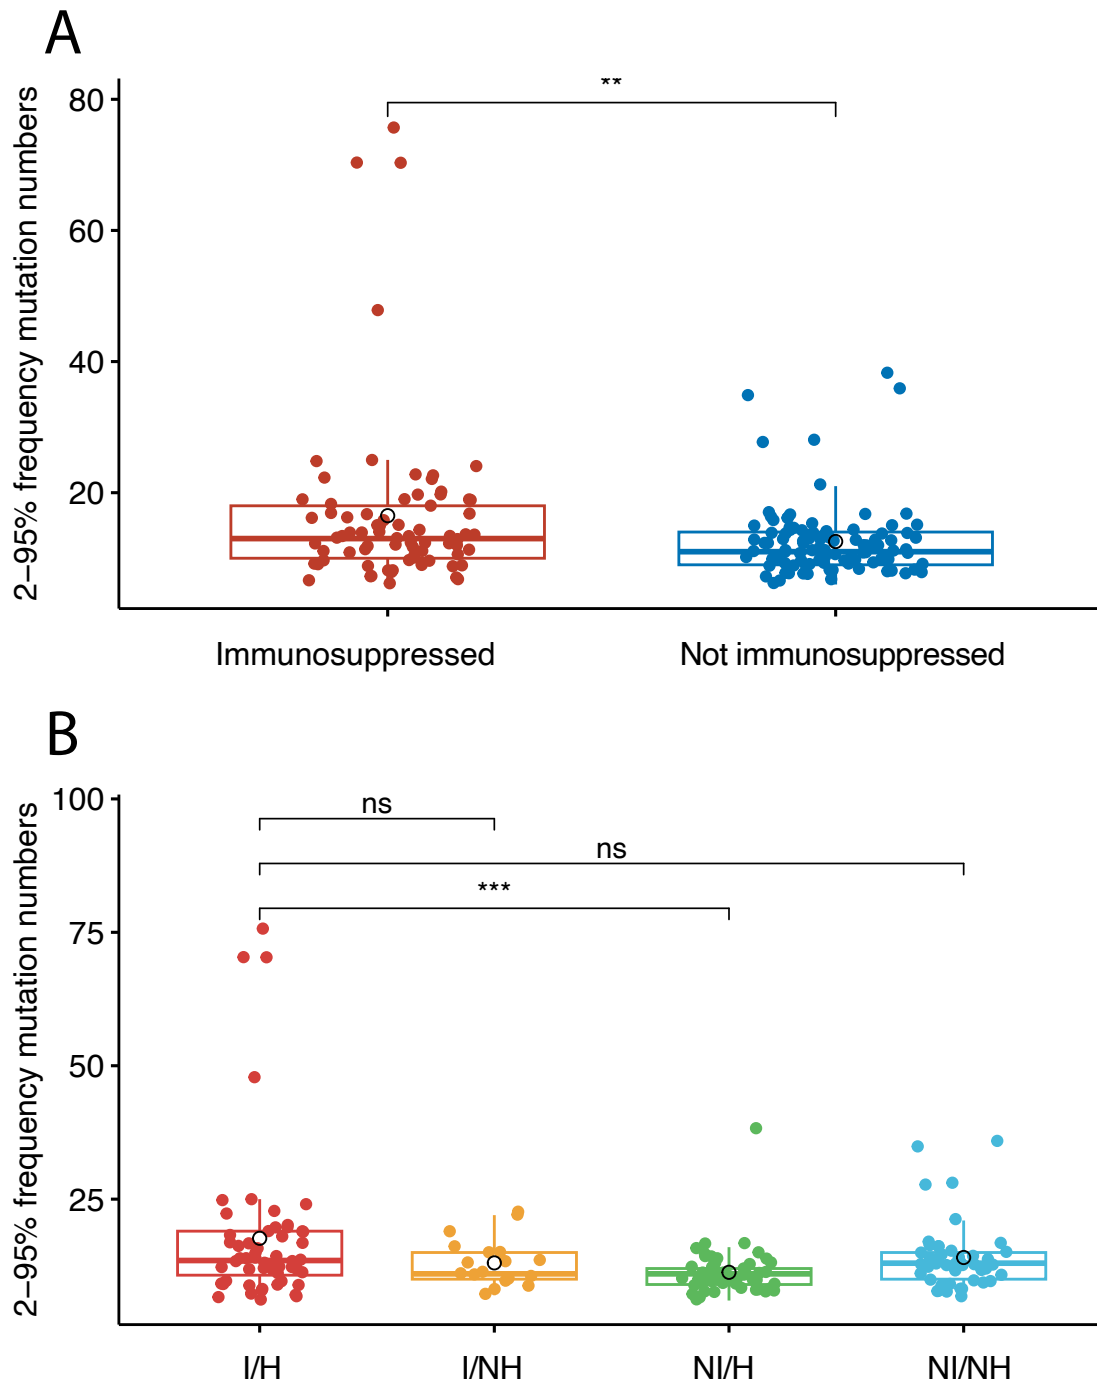

Figure S2. Levels of all iSNVs in patient groups. A). 2-95% frequency iSNVs in patients of different immunity status. B). 2-95% frequency iSNVs in patients of different status of immunity and hospitalization. The horizontal lines in the box plot represent for 25%, 50%, and 75% data percentile. The mean value of each group is shown in black hollow circle. Statistics are performed using the Wilcoxon test, with the p-value significance shown in each comparison. I/H, immunosuppressed and hospitalized; I/NH, immunosuppressed and not hospitalized; NI/H, not immunosuppressed and hospitalized; NI/NH, not immunosuppressed and not hospitalized.

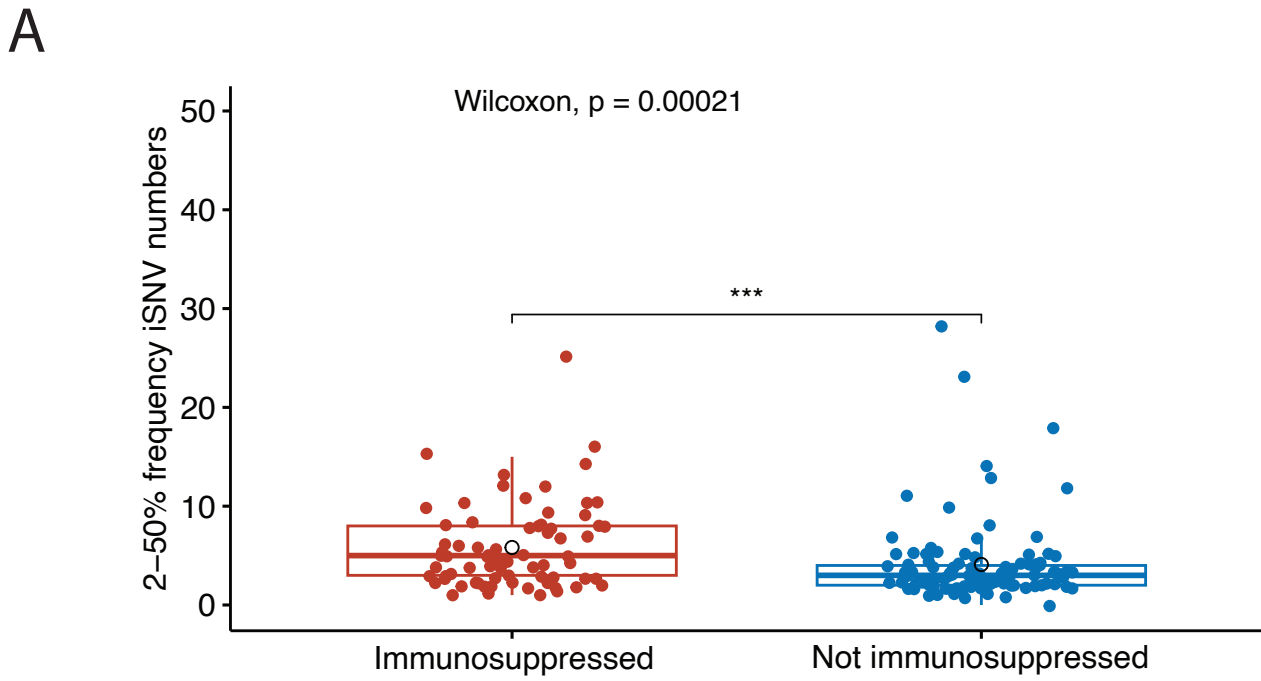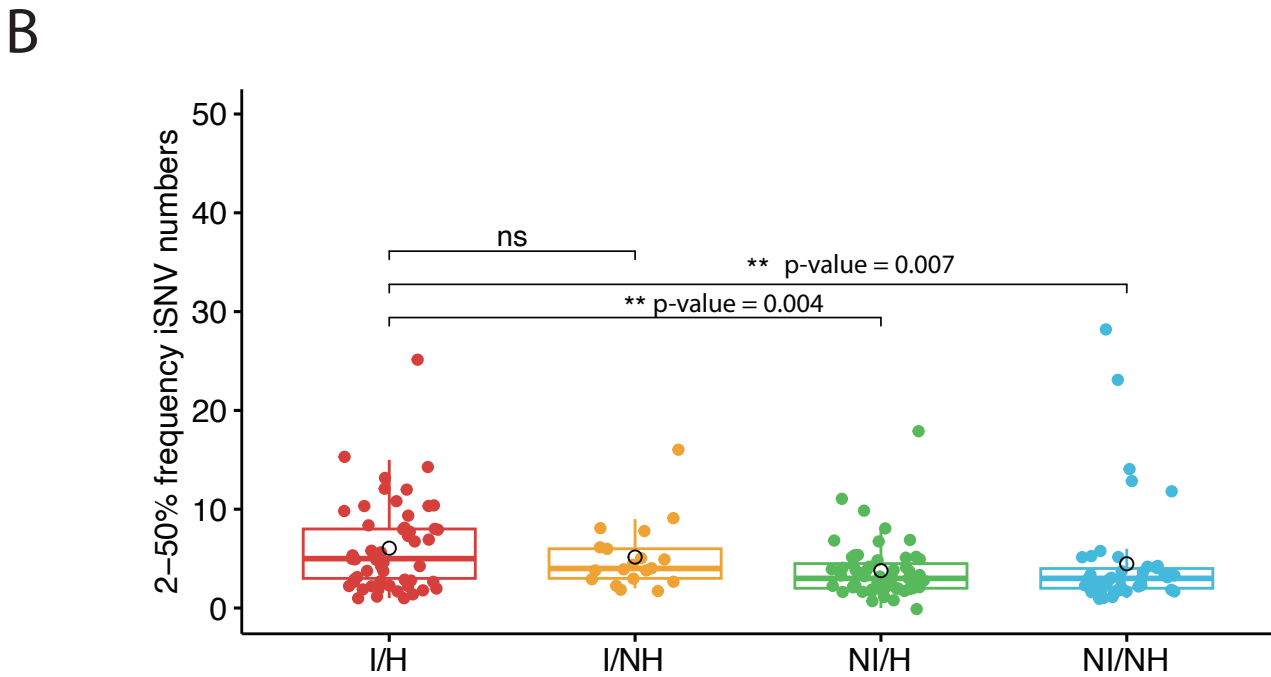

Figure S3. Levels of low frequency iSNVs in patients without the three patients who had the highest numbers (potential outliers). A). 2-50% frequency iSNVs in patients of different immunity status without the three outliers. B). 2-50% frequency iSNVs in patients of different status of immunity and hospitalization without the three outliers. The horizontal lines in the box plot represent for 25%, 50%, and 75% data percentile. The mean value of each group is shown in black hollow circle. Statistics are performed using the Wilcoxon test, with the p-value significance shown in each comparison.



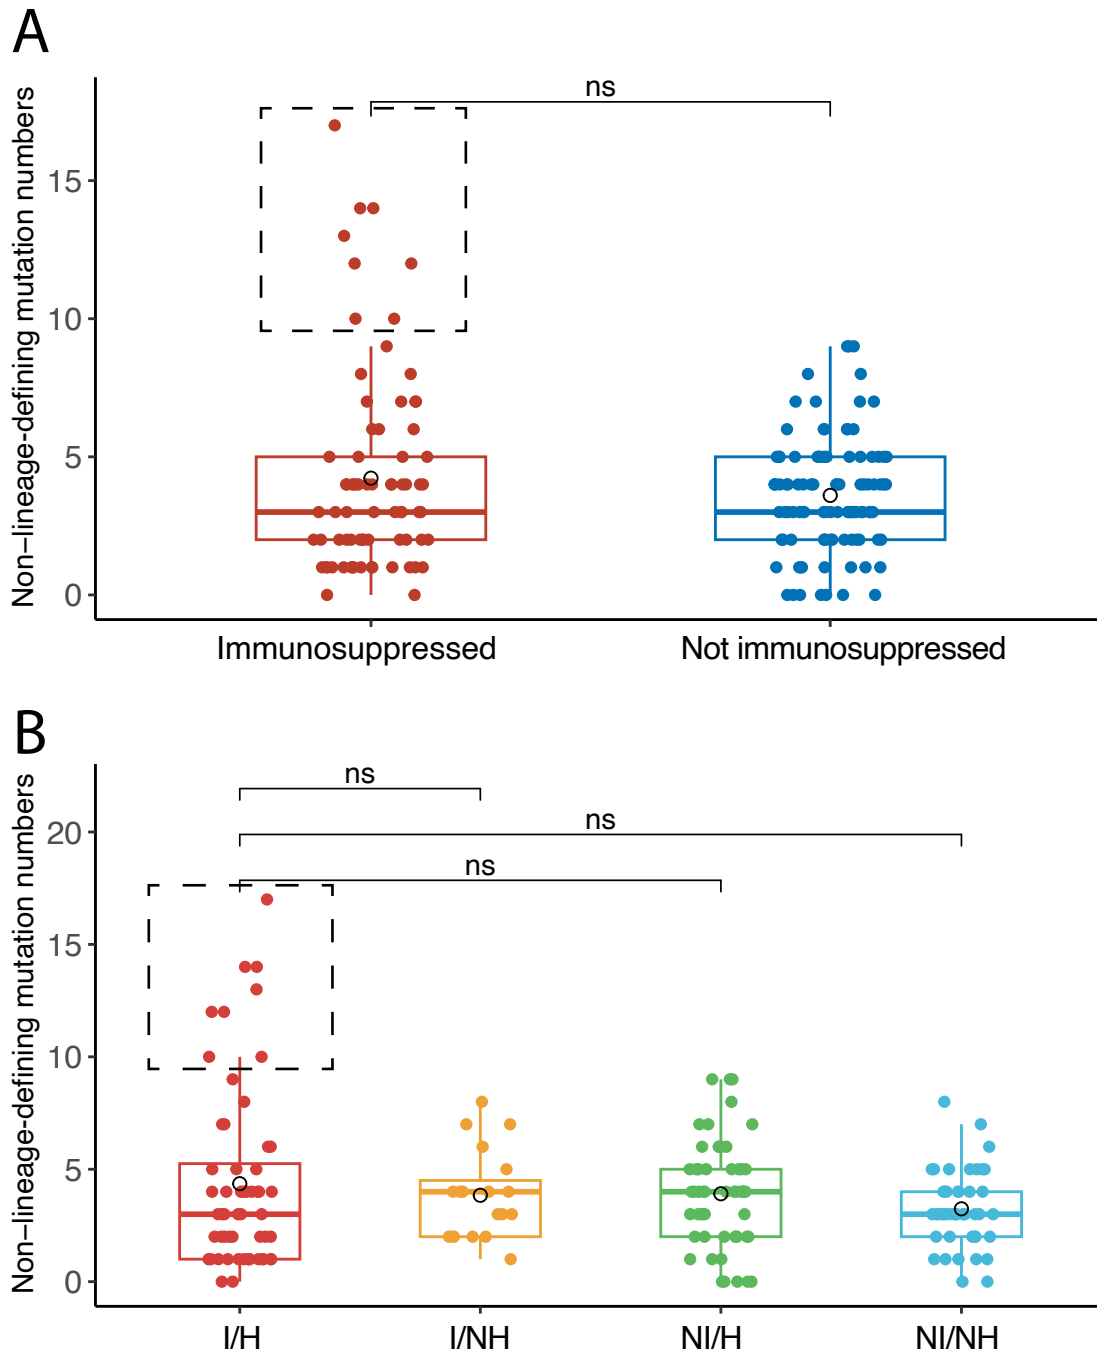

Figure S5. Levels of non-lineage-defining mutations in patient groups. A). Levels of non-lineage-defining mutations in patients of different immunity status. B). Levels of non-lineage-defining mutations in patients of different status of immunity and hospitalization. Samples in the black dashed box have more 10 or more lineage-defining mutations. The horizontal lines in the box plot represent for 25%, 50% and 75% data percentile. The mean value of each group is shown in black hollow circle. Statistics are performed using the Wilcoxon test, with the p-value significance shown in each comparison. I/H, immunosuppressed and hospitalized; I/NH, immunosuppressed and not hospitalized; NI/H, not immunosuppressed and hospitalized; NI/NH, not immunosuppressed and not hospitalized.

**Supplemental Table 1.** Information on the 14 repeatedly sampled patients in this study and their accumulated viral mutations.

| Patient ID | Age/ Sex | COVID-related Hospitalization     | Immuno-suppressed | Reason for immuno-suppression* | SARS-CoV-2 Lineage | 1st sampling date | Sampling interval (days) | SARS-CoV-2 treatment before 1st sampling                                      | SARS-CoV-2 treatments between samplings                  | Developed mutations >50% frequency (NT)                     | Developed mutations >50% frequency (AA)                                                    | Immunosuppressive medication                    | Other comorbidities**                        |
|------------|----------|-----------------------------------|-------------------|--------------------------------|--------------------|-------------------|--------------------------|-------------------------------------------------------------------------------|----------------------------------------------------------|-------------------------------------------------------------|--------------------------------------------------------------------------------------------|-------------------------------------------------|----------------------------------------------|
| P29        | 62/F     | yes                               | yes               | AML                            | BA.1.1             | 01/15/22          | 17                       | /                                                                             | Molnupiravir for 5 days                                  | T168C, C4965T, G4985A, C12784T, G23012A, G23282A            | ORF1a:T1567I (nsp3), ORF1a:V1574I (nsp3), S:E484T (RBD), S:D574N                           | Decitabine, venetoclax                          | /                                            |
| P78        | 67/M     | hospitalized for non-COVID reason | yes               | SOT-lung                       | BA.2.9             | 05/04/22          | 64                       | Tixagevimab/cilgavimab 2 months and 3 months prior, respectively              | Bebtelovimab infusion                                    | C186T, C8480T, 21763-21768 del, G22894T, G22898C            | ORF1a:P2739S (nsp3), S: 68/69- (NTD; RDR1), S:K444N (RBD), S:G446R (RBD)                   | Mycophenolate mofetil, prednisolone, tacrolimus | DM, CKD                                      |
| P126       | 59/M     | hospitalized for non-COVID reason | yes               | SOT-kidney                     | BA.5.5             | 07/14/22          | 21                       | Tixagevimab/cilgavimab; 10 days prior                                         | Remdesivir for 3 days                                    | C11750T, 21972-21995 del, 22289-22294 del, G24816C, G28975T | ORF1a:L3829F (nsp6), S: 138-145del (NTD; RDR2), S: 242/243- (NTD; RDR4), S:G1085A, N:M234I | Mycophenolate mofetil, tacrolimus               | DM, Cirrhosis/NASH, CAD/HTN, HLD             |
| P148       | 73/M     | yes                               | yes               | SOT-liver and kidney           | BA.5.1             | 08/02/22          | 6                        | Convalescent plasma; dexamethasone and remdesivir for 5 days                  | /                                                        | A3078G                                                      | ORF1a:E938G (nsp3)                                                                         | Mycophenolate mofetil, prednisolone, tacrolimus | AF/HTN, HLD                                  |
| P14        | 70/M     | yes                               | yes               | CLL                            | AY.103             | 12/31/21          | 11                       | Casirivimab/imdevimab, dexamethasone and remdesivir for 5 days; 22 days prior | /                                                        | /                                                           | /                                                                                          | Ibrutinib                                       | CAD, CKD, HLD                                |
| P16        | 78/M     | yes                               | yes               | CLL                            | BA.1               | 01/04/22          | 14                       | /                                                                             | /                                                        | /                                                           | /                                                                                          | Acalabrutinib                                   | DM, Heart failure/AF, HLD                    |
| P142       | 52/F     | no                                | yes               | Lymphoma                       | BA.5.2             | 07/28/22          | 1                        | /                                                                             | /                                                        | /                                                           | /                                                                                          | Rituximab                                       | HTN                                          |
| P143       | 62/F     | no                                | yes               | SOT-kidney                     | BA.5.2.1           | 7/29/22           | 4                        | /                                                                             | Nirmatrelvir/ritonavir, remdesivir for 5 days            | /                                                           | /                                                                                          | Mycophenolate mofetil, prednisolone, tacrolimus | DM, heart attack/HTN, HLD                    |
| P155       | 77/F     | no                                | yes               | RA                             | BA.5.2             | 08/10/22          | 6                        | /                                                                             | /                                                        | /                                                           | /                                                                                          | Etanercept                                      | DM, heart attack/CAD/heart failure           |
| P192       | 67/F     | no                                | yes               | RA                             | BA.5.2.1           | 11/04/22          | 13                       | /                                                                             | /                                                        | /                                                           | /                                                                                          | Mycophenolate mofetil, prednisolone, tacrolimus | NAFLD, HTN, HLD, ILD                         |
| P71        | 83/F     | no                                | no                | /                              | BA.2               | 04/25/22          | 8                        | /                                                                             | /                                                        | /                                                           | /                                                                                          | /                                               | AF/HTN                                       |
| P90        | 87/M     | no                                | no                | /                              | BA.2.12.1          | 05/23/22          | 1                        | /                                                                             | Remdesivir for 3 days                                    | /                                                           | /                                                                                          | /                                               | DM, ERSD, CAD/heart failure/HTN, HLD, asthma |
| P83        | 33/M     | no                                | no                | /                              | BA.2.12.1          | 05/12/22          | 7                        | /                                                                             | /                                                        | /                                                           | /                                                                                          | /                                               | /                                            |
| P125       | 77/M     | yes                               | no                | /                              | BA.5.2             | 07/13/22          | 0                        | Remdesivir for 5 days                                                         | Dexamethasone for 10 days, nirmatrelvir/ritonavir 1 dose | /                                                           | /                                                                                          | /                                               | DM, CKD, heart failure/CAD, HLD              |

\*RA, Rheumatoid arthritis; SOT, Solid organ transplant; AML, Acute myeloid leukemia; CLL, Chronic lymphocytic leukemia;

\*\*NAFLD, Nonalcoholic fatty liver disease; NASH, Nonalcoholic steatohepatitis; DM, Diabetes mellitus; ILD, Interstitial lung diseases; HLD, Hyperlipidemia; HTN, Hypertension; CKD, Chronic kidney disease; CAD, Coronary artery disease; ERSD, End-Stage Renal Disease; AF, Atrial fibrillation.
